# Supplementary material for: Spatial Downscaling of GRACE Data Based on XGBoost Model for Improved Understanding of Hydrological Droughts in the Indus Basin Irrigation System (IBIS)
Source: MDPI journal article supplement (doi:10.3390/rs15040873), 2023-02-04
Supplement: s1 [file s1]

Archive with 1 entries (1 files):
- remotesensing-2124763-supplementary.pdf
