# Supplementary material for: Spatial Downscaling of GRACE Data Based on XGBoost Model for Improved Understanding of Hydrological Droughts in the Indus Basin Irrigation System (IBIS)
Source: MDPI journal article supplement (doi:10.3390/rs15040873), 2023-02-04
Supplement: s1 [file s1 › remotesensing-2124763-supplementary.pdf]

## Supplementary Materials

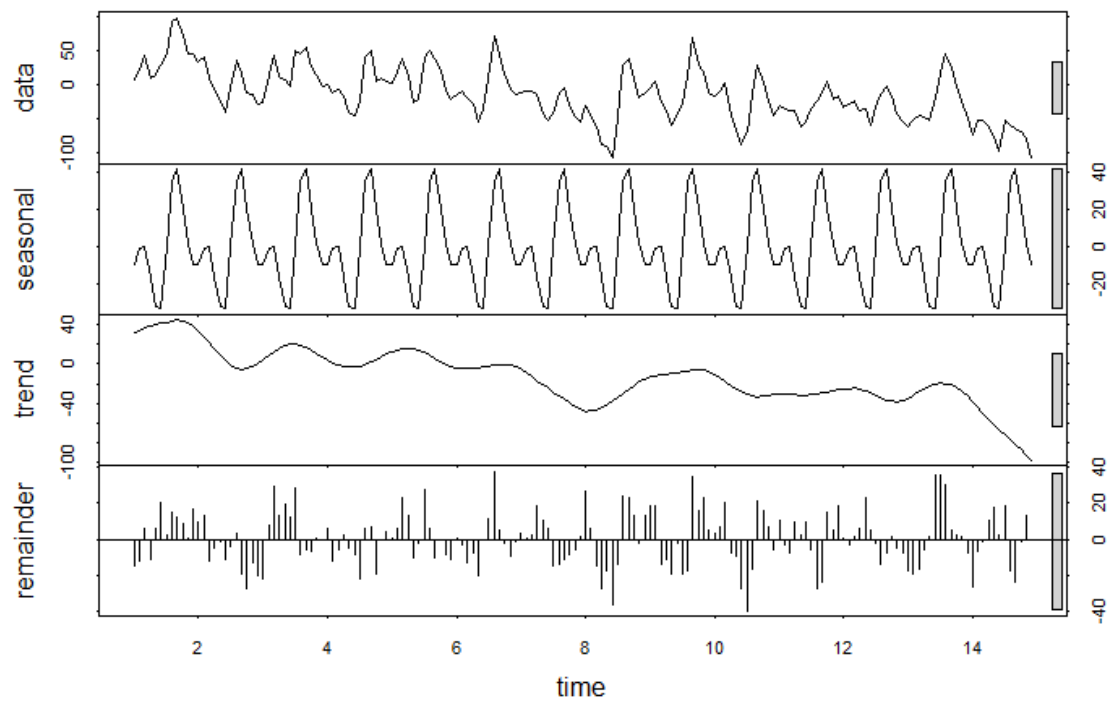

**Figure. S1** An example of TWSA time series decomposition into seasonal, trend, and remainder components performed using the STL methods.

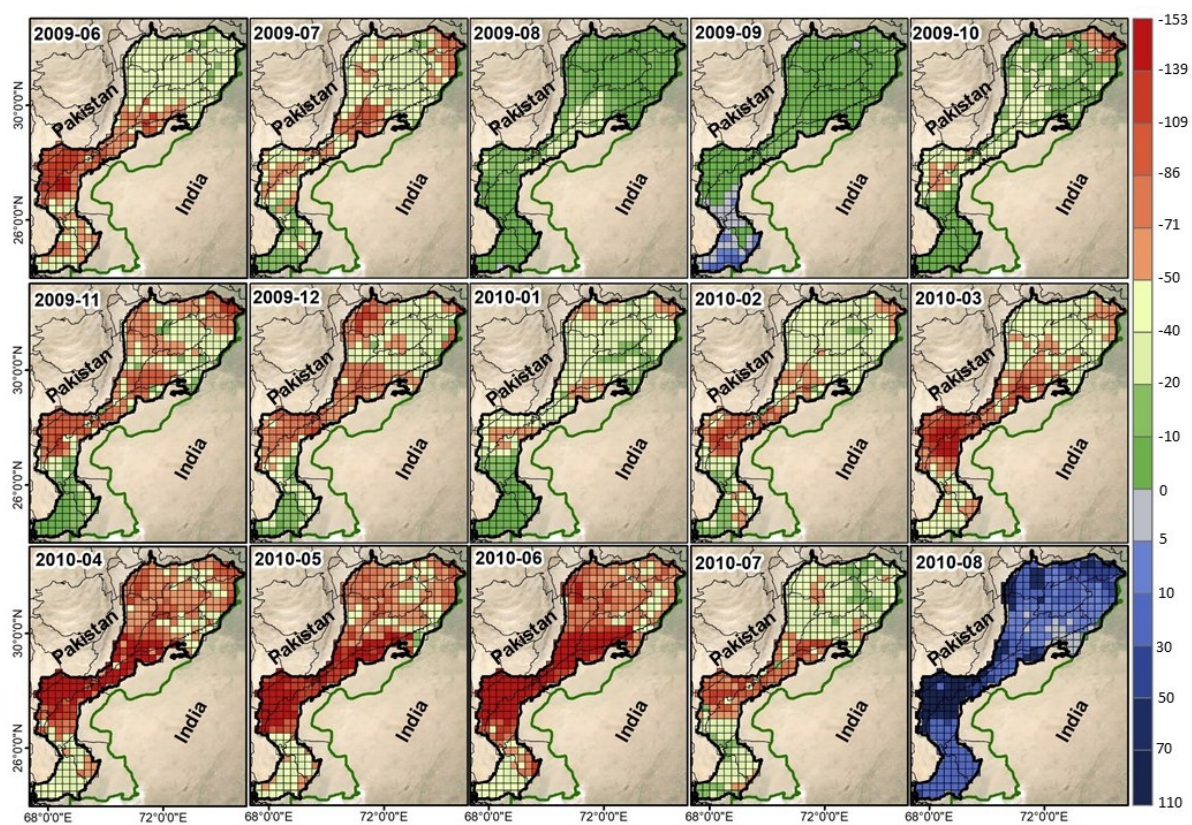

**Figure. S2** Spatial distribution of Downscaled TWSA patterns from 2009.06 to 2010.08 in the IBIS.

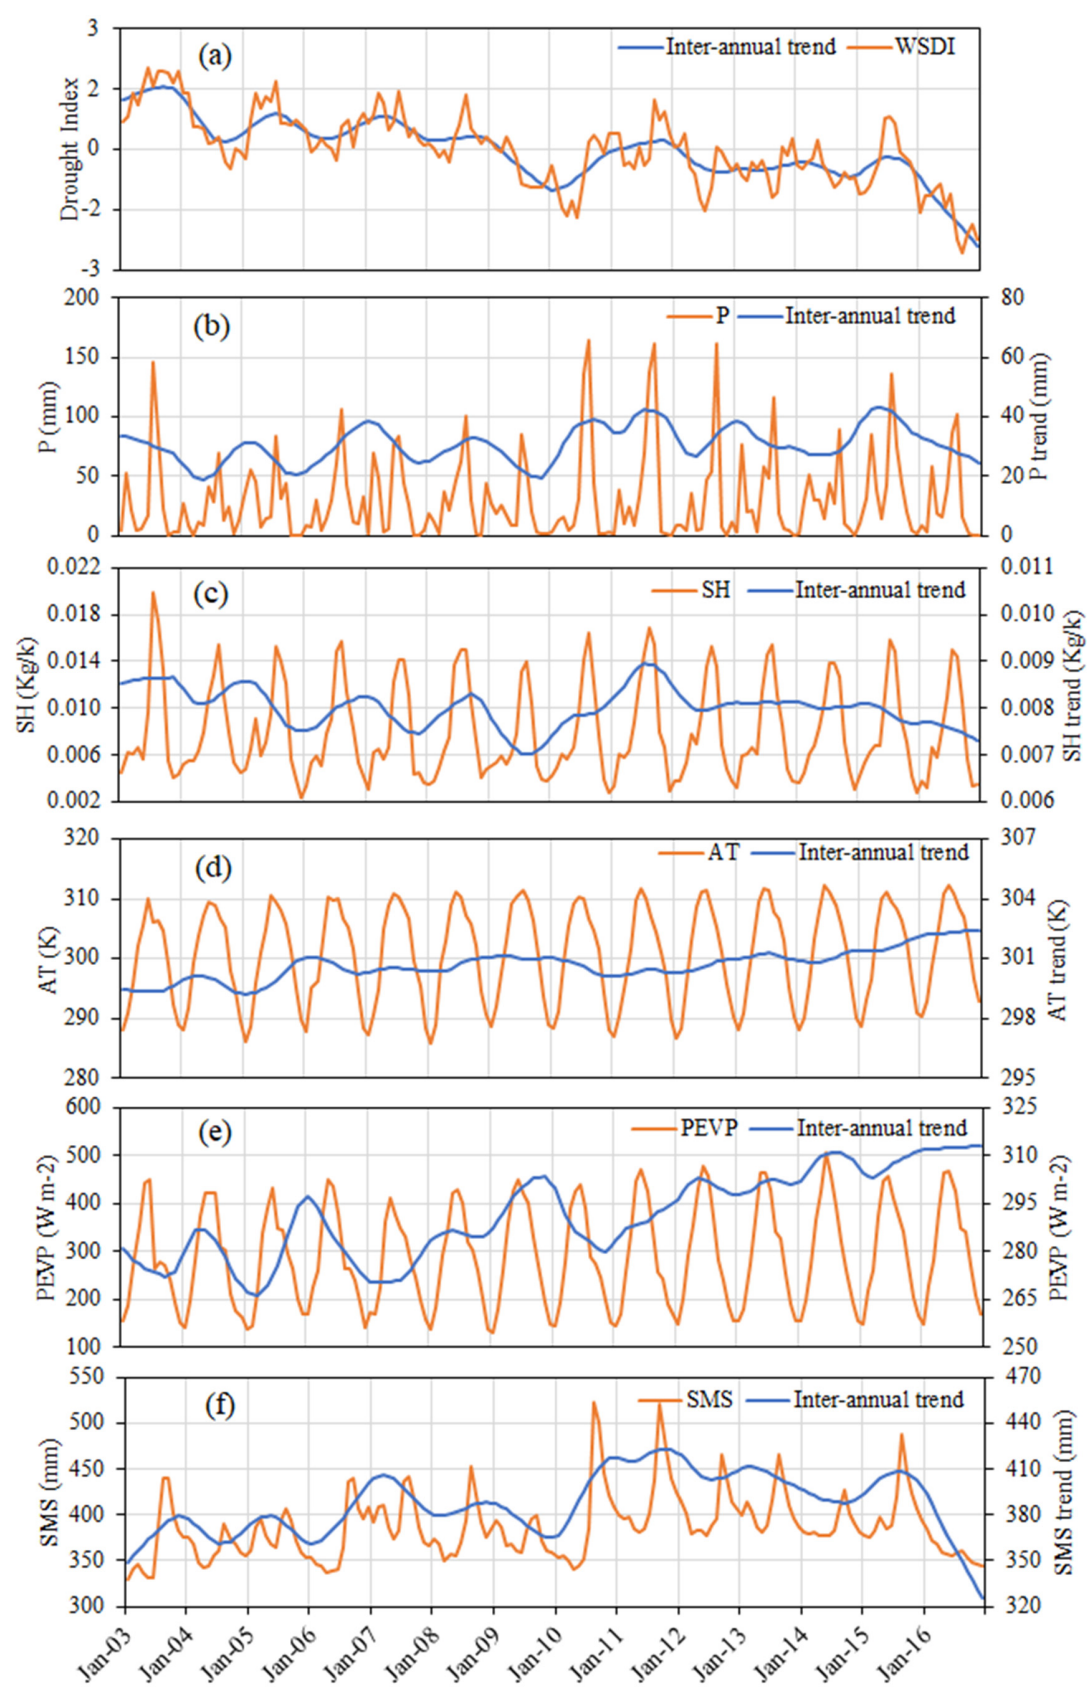

**Figure. S3** (a) Comparison between WSDI and inter-annual trend, and (b-f) comparison between STL decomposed inter-annual trends and original data of climatic variables.

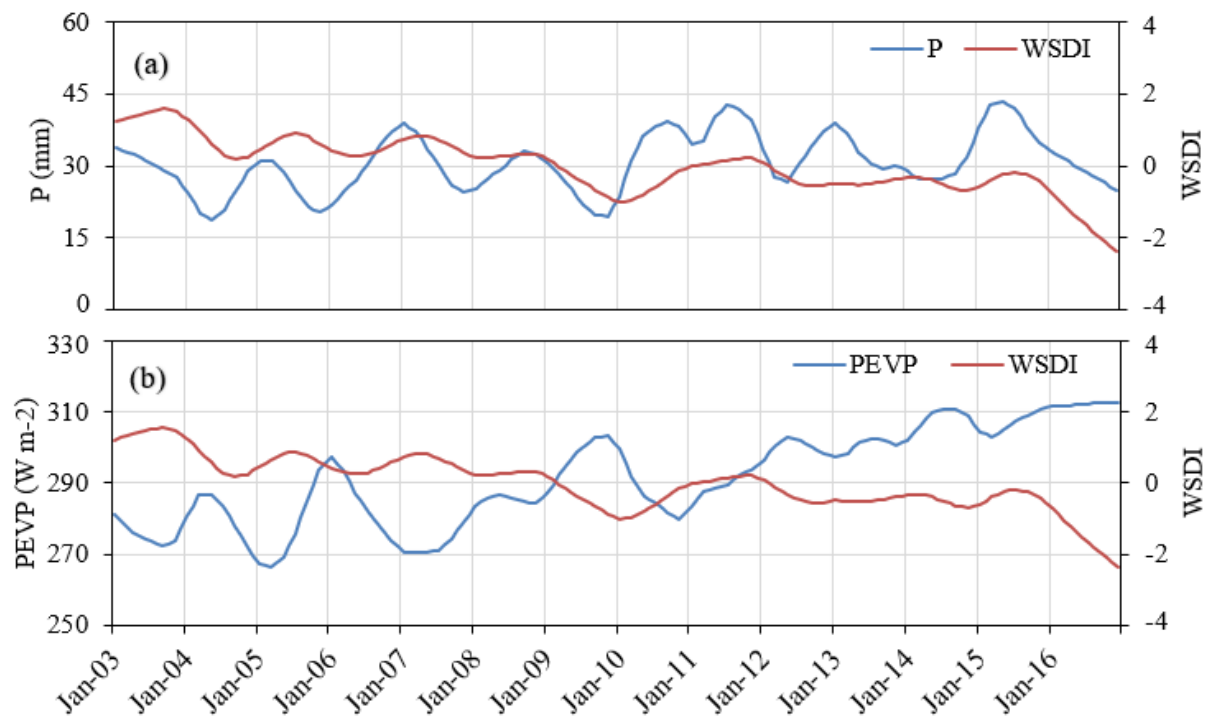

**Figure. S4** Comparison of trends between WSDI and climate variables (a) WSDI and precipitation and (b) WSDI and potential evaporation.

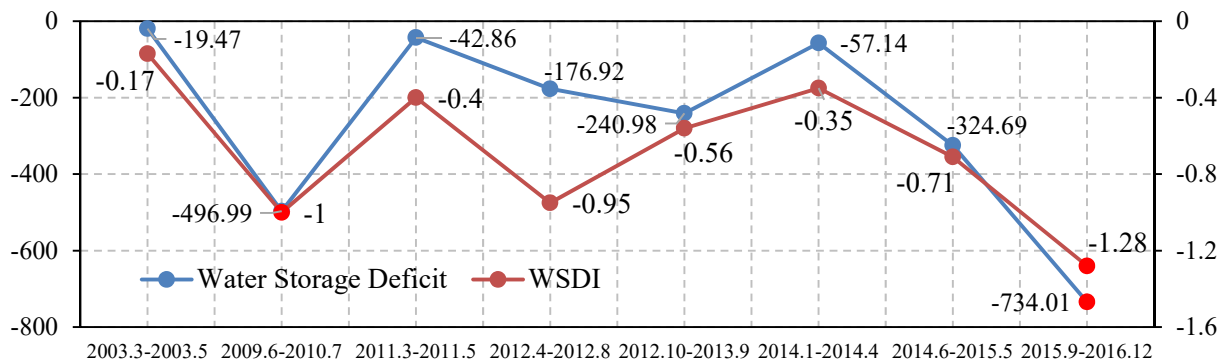

**Figure. S5** Comparison of eight drought events identified by total WSD and WSDI during the study. The most severe droughts in 2010 and 2016 are shown with red shading indicate.
